# Supplementary material
Source: publisher site journal article supplement (http://kjim.org/upload/media/kjim-2020-282-suppl3.pdf)
Supplement: Supplementary file 1 [file kjim-2020-282-suppl3.pdf]

**Supplementary Table 3. Diagnostic process and related events according to the initial imaging modality in the sensitivity analysis population**

| Variable                                  | Chest X-ray group<br>(n = 191) | Chest CT group<br>(n = 258) | p value |
|-------------------------------------------|--------------------------------|-----------------------------|---------|
| Initial radiologically abnormalities      | 4 (2.1)                        | 147 (57)                    | < 0.001 |
| Calcified granulomas or lymph nodes       | 3 (1.6)                        | 121 (46.9)                  | < 0.001 |
| Fibronodular scarring                     | 0                              | 18 (7)                      | < 0.001 |
| Pleural thickening or calcification       | 1 (0.5)                        | 1 (0.4)                     | 1.000   |
| Cavitation                                | 0                              | 0                           | 1.000   |
| Consolidation                             | 1 (0.5)                        | 0                           | 0.425   |
| Centrilobular and tree-in-bud nodules     | 2 (1)                          | 19 (7.4)                    | 0.002   |
| Suspected as active TB in initial imaging | 2 (1)                          | 13 (5)                      | 0.030   |
| Bronchoscopy                              | 1 (0.5)                        | 12 (4.7)                    | 0.009   |
| Bronchoscopy-related complications        | 0                              | 0                           | 1.000   |
| AFB smear/culture in respiratory specimen | 10 (5.2)                       | 22 (8.5)                    | 0.181   |
| TB PCR in respiratory specimen            | 1 (0.5)                        | 15 (5.8)                    | 0.003   |
| Hospital visit during follow-up           | 3.2 ± 2.1                      | 4.3 ± 2.2                   | < 0.001 |
| Diagnosed as active TB                    | 1 (0.5)                        | 8 (3.1)                     | 0.085   |

Values are presented as number (%) or mean ± standard deviation.

CT, computed tomography; TB, tuberculosis; AFB, acid-fast bacilli; PCR, polymerase chain reaction.
